# Supplementary material for: Comparing Performance of Spectral Image Analysis Approaches for Detection of Cellular Signals in Time-Lapse Hyperspectral Imaging Fluorescence Excitation-Scanning Microscopy
Source: Bioengineering (Basel). 2023 May 25;10(6):642. doi: 10.3390/bioengineering10060642 (PMC10295298; doi:10.3390/bioengineering10060642)
Supplement: Supplementary file 1 [file bioengineering-10-00642-s001.zip]

Archive with 7 entries (7 files):
- Supplemental Figure S1.pdf
- Supplemental Video S1.avi
- Supplemental Video S2.avi
- Supplemental Video S3.avi
- Supplemental Video S4.avi
- Supplemental Video S5.avi
- Supplemental Video S6.avi
